# Supplementary material
Source: Springer Nature journal article supplement (https://www.springermedizin.de/resource/supplementary/12876_2011_683_MOESM4_ESM.pdf/9437202)

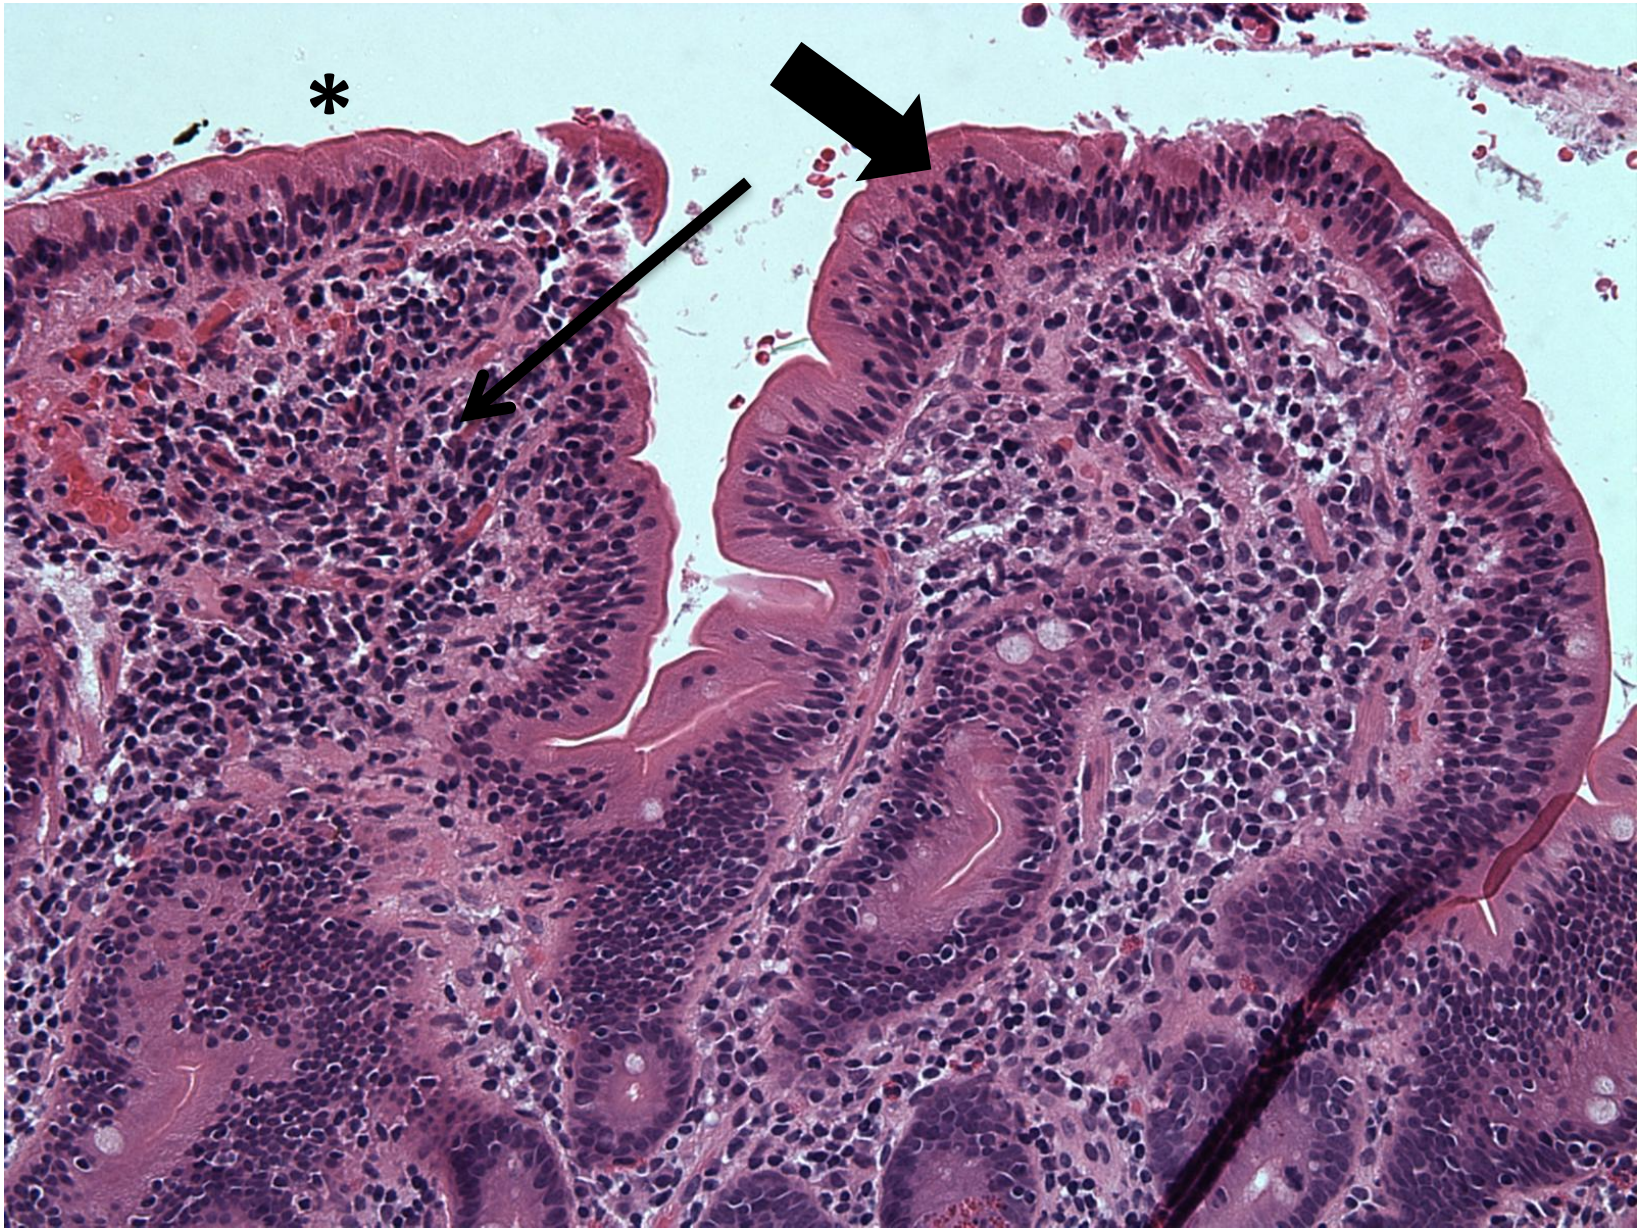

Supplement: MOESM4 [file 9437202]
